# Supplementary material for: Short-Read Genome Sequencing at Population Scale: Diagnostic Insights From 2,317 Patients
Source: Research Square preprint supplement (doi:10.21203/rs.3.rs-7432106/v1), 2025-09-17
Supplement: Supplementary file 1 [file c0e5ed6fae5ce524377b8b6a.xlsx]

## Sheet: Sheet1
Patient group (implemenation date)	Patient subgroup; DNGC	Patient subgroup as analysed in this study if applicaple.
Hereditary heart disease (3rd december 2021)
	Thoracic aortic disease
	Long QT syndrome
	Catecholaminergic polymorphic ventricular tachycardia
	Brugada syndrome
	Dilated cardiomyopathy
	Hypertrophic cardiomyopathy
	Arrhythmogenic cardiomyopathy
		ICA: either cardiomyopathy or arytmia - both gene panels analysed
Childhood cancer (15th october 2021)
	Children (0-17 years) with newly diagnosed cancer	no subgroup; all analysed the same way
	Young people (18-20 years) treated in a pediatric oncology department with a tumor typical of childhood
	Where the cancer diagnosis is made in childhood (0-17 years) and resistance, progression, recurrence, or 2nd cancer occurs (i) while the patient is <18 years and/or (ii) up to 5 years from the time of diagnosis, whole genome sequencing can be requested for newly diagnosed patients with:
	Treatment-resistant, progressed, or recurrent cancer
	2nd (or later) cancer
Cancer in young adults and hereditary cancer in adults ( 27th April 2022)
	Invasive cancer (all types)	no subgroup; all analysed the same way
	Hematological malignancy
	CNS tumors requiring treatment
Endocrinological patients (3rd december 2021)
	Multiple endocrine neoplasias
	Pheochromocytoma and paraganglioma and other adrenal diseases
	Monogenic diabetes
	Rare thyroid diseases
	Rare calcium and bone metabolic diseases
	Organic hypoglycemia
	Disorders of sex development
	Growth and obesity syndromes
	Hypogonadotropin hypogonadism
	Congenital multiple pituitary defects
Hematology (3rd december 2021)
	Malignant hereditary hematological diseases
	Unexplained cytopenia (children and adolescents 0-17 years)
	Inherited platelet defects (adults > 18 years)
	Unexplained hemolytic anemia
Hereditary cholestatic and fibrotic liver diseases (16th august 2022)
	Unresolved chronic cholestasis
	Recurrent cholestasis
	Severe cholestatic drug reaction
	Cholestasis of pregnancy
	Gallstone disease in a patient < 40 years of age with persistent discomfort after cholecystectomy
	Portal hypertension
	Portal sclerosis
	Liver fibrosis/cirrhosis
	Fibropolycystic liver disease
Audiogenetics (7th july 2022)
	Suspected non-syndromic hearing loss
	Suspected syndromic hearing loss
Fetal medicine (28th September 2022)
	Pregnant woman, where the fetus in the 1st trimester/early 2nd trimester has been detected with a nuchal fold of ≥3.5 mm, and where early malformation scan in week 16 continues to show nuchal edema – or additional ultrasound abnormalities are detected	Custom panel
	Dead fetus/child (intrauterine/perinatal death or due to spontaneous or provoked abortion), and where a malformation/anomaly has been found, or other findings that give rise to suspicion of a genetically determined disease (registered on the mother's CPR no.).
	Pregnant women with a fetus that has been diagnosed with malformations including: skeletal anomalies, neuromuscular diseases/fetal akinesia hypokinesia deformation sequence (FADS), non-immune hydrops fetalis (NIHF), CNS malformations, diaphragmatic hernia (CDH) or multiple anomalies – possibly other selected malformations (cardiac malformations, selected renal malformations (CAKUT) or omphalocele)
	Pregnant woman, where the fetus in the 1st trimester/early 2nd trimester has been detected with a nuchal fold of ≥6.0 mm
	Pregnant woman, where the fetus has been detected with severe growth retardation before week 32, defined as at least one biometric measure less than -3 SD/Z-score < -3
Inborn errors of immunity (3rd December 2021)
	Primary immunodeficiency with increased susceptibility to infection
	Autoinflammation
	Autoimmunity/immune dysregulation
	Infectious susceptibility and/or immune dysregulation as part of a syndrome (concurrent with somatic phenotype)
Neurogenetic patients (June 2022)
	Hereditary basal ganglia disease
	Hereditary ataxia and spastic paraplegia
	Hereditary neuropathy
	Suspected hereditary epilepsy
	Suspected hereditary muscle disease
	Early onset dementia, including FTD/ALS spectrum disease and hereditary cerebral vascular disease
Kidney failure (June 2022)
	Chronic kidney disease of unknown cause in Children and adolescents (<18 years)	Kidney failure, terminal and pre-terminal kidney failure of unknown cause in children and adolescents
	Chronic kidney disease of unknown cause in Adults (18-60 years)	Kidney failure, terminal and pre-terminal kidney failure of unknown cause in adults
	Steroid-resistant nephrotic syndrome	Kidney failure, Persistent unexplained albuminuria in children and adolescents, trio or Kidney failure, Persistent unexplained albuminuria in adults
	Secondary FSGS with no known underlying cause
	Unexplained, persistent albuminuria in patients with a familial predisposition to kidney disease
	Onset of nephrotic albuminuria < 2 years of age
Psychiatry, children and adolescents (10th June 2022)
	Mental retardation/delayed psychomotor development
	Dysmorphic features
	Epilepsy
Rare diseases in children (January 2021)
	One or more malformations	Custom panel
	Complex disease picture	Short stature, and osteoarthritis
	Global developmental delay with developmental deficits in two or more developmental domains, with IQ<70 for children and adolescents over 6 years of age, or a need for a special institution/school	trio analysis
	Skeletal anomaly. For example, shortened tubular bones, multiple craniosynostosis, skeletal dysplasia or dwarfism	skeletal dysplasia
	Neuromuscular or neurological disease. For example, symptomatic malformations in the central nervous system, leukoencephalopathy, ataxia, epilepsy, myopathy, micro-/ macrocephaly accompanied by intellectual disability
	Suspected congenital metabolic disease
	Arthrogryposis
	Overgrowth
	Floppy infant
Rare diseases in adults (7th July 2022)
	One or more malformations	Custom panel
	Complex disease picture	Short stature, and osteoarthritis
	Mental retardation/mental retardation, with IQ<70 or need for a special institution or no possibility of living an independent life.	trio analysis
	Skeletal anomaly	skeletal dysplasia
	Neuromuscular or neurological disease
	Suspected congenital metabolic disease
	Suspected connective tissue disorder with blood vessel anomalies
Hereditary skin disorders (16th August 2022)
	Congenital ichthyosis
	Epidermolysis bullosa
	Ectodermal dysplasia
	Palmoplantar keratoderma
	Primary lymphedema
	Undiagnosed, severe, suspected, genetic skin disorder
Hematological cancer (3rd June 2022)		this patient group was not analysed in our region
	Acute myeloid leukemia and related myeloid precursor diseases
	Myelodysplastic syndrome and related myeloid precursor diseases
	Combined myelodysplastic/myeloproliferative neoplasms
	Lymphoma diseases
	Plasma cell diseases
	Chronic myeloid neoplasms
	Acute leukemias/lymphoblastic lymphoma
Ophthalmology (7th July 2022)		this patient group was not analysed in our region
	Hereditary retinal diseases
	Bilateral cataracts in childhood
	Structural eye diseases
	Optical nerve diseases
	Ultra-rare eye diseases
Widespread and incurable cancer (July 2022)		This patient group was not included in our study; which focus on germline analysis
	Pancreatic cancer
	Thymus epithelial cell tumors
	Metastatic cancer (solid tumors)
	Metastatic or recurrent sarcoma
	Primary brain tumors
